# Supplementary material for: Screening out Biomarkers of Tetrastigma hemsleyanum for Anti-Cancer and Anti-Inflammatory Based on Spectrum-Effect Relationship Coupled with UPLC-Q-TOF-MS
Source: Molecules. 2023 Mar 28;28(7):3021. doi: 10.3390/molecules28073021 (PMC10096277; doi:10.3390/molecules28073021)
Supplement: Supplementary file 1 [file molecules-28-03021-s001.zip › molecules-2263589-supplementary.pdf]

## Supplementary Material

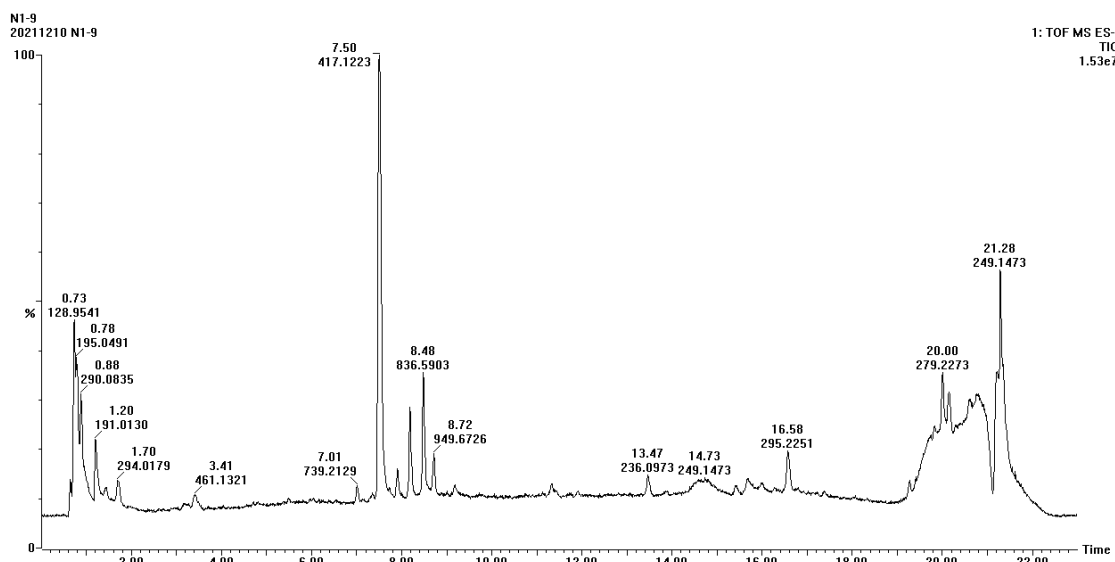

**Figure S1.** The representative total ion chromatography (TIC) of *T. hemsleyanum* extract.

**Table S1.** The sources of samples.

| Sample No. | Picking or Collecting Address | Wild or Cultivated | Base Address                                                                | Period and Year of Collection |
|------------|-------------------------------|--------------------|-----------------------------------------------------------------------------|-------------------------------|
| AH-HS      | Huangshan, Anhui              | cultivated         | Sankou Town, Huangshan District, Huangshan City, Anhui Province             | 2021.12                       |
| FJ-FZ      | Fuzhou, Fujian                | cultivated         | Chian Village, Dangyun Township, Yongtai County, Fuzhou City                | 2021.12                       |
| FJ-SM      | Sanming, Fujian               | cultivated         | Shiliao Village, Shuixi Town, Ninghua County, Sanming City, Fujian Province | 2021.12                       |
| FJ-SC      | Fujian market circulation     | cultivated         | Fujian herbal market                                                        | 2021.12                       |
| GZ-ZY      | Zunyi, Guizhou                | cultivated         | Meitan County, Zunyi City, Guizhou Province                                 | 2021.12                       |
| GZ-BJ      | Bijie, Guizhou                | cultivated         | Nayong County, Bijie District, Guizhou Province                             | 2021.12                       |
| GZ-SC      | Guizhou market circulation    | cultivated         | Guizhou herbal market                                                       | 2021.12                       |
| GX-HC      | Hechi, Guangxi                | cultivated         | Tian'e County, Hechi City, Guangxi Province                                 | 2021.12                       |
| GX-BS      | Guangxi Baise market          | cultivated         | Guangxi herbal market                                                       | 2021.12                       |
| GX-SC      | Guangxi market circulation    | cultivated         | Guangxi herbal market                                                       | 2021.12                       |
| GX-LS      | Guangxi Longsheng market      | cultivated         | Guangxi herbal market                                                       | 2021.12                       |
| GX-LY      | Leye, Guangxi                 | cultivated         | Guangxi herbal market                                                       | 2021.12                       |
| GD-SC      | Guangdong market circulation  | cultivated         | Guangdong herbal market                                                     | 2021.12                       |
| JX-JGS     | Jinggangshan, Jiangxi         | cultivated         | Jiangxi herbal market                                                       | 2021.12                       |
| JX-SR      | Shangrao, Jiangxi             | cultivated         | Yufeng Village, Huaiyu Township, Yushan County, Shangrao City, Jiangxi      | 2021.12                       |
| SC-CQ      | Chongqing, Sichuan            | cultivated         | Wanzhou District, Chongqing                                                 | 2021.12                       |
| SC-SC      | Sichuan market circulation    | cultivated         | Sichaun herbal market                                                       | 2021.12                       |
| ZJ-QY      | Qingyuan, Zhejiang            | cultivated         | Qingyuan County, Lishui City, Zhejiang Province                             | 2021.12                       |
| ZJ-SX      | Shaoxing, Zhejiang            | cultivated         | Yujiayan Village, Keqiao District, Shaoxing City, Zhejiang Province         | 2021.12                       |

---

|          |                             |            |                                                                    |         |
|----------|-----------------------------|------------|--------------------------------------------------------------------|---------|
| ZJ-PQ    | Puqian, Zhejiang            | cultivated | Puqian Village, Yuhang District, Hangzhou City, Zhejiang Province  | 2021.12 |
| ZJ-CA    | Chunan, Zhejiang            | cultivated | Chun'an County, Hangzhou City, Zhejiang Province                   | 2021.12 |
| ZJ-LQ    | Longquan, Zhejiang          | cultivated | Badu Town, Longquan City, Lishui City, Zhejiang Province           | 2021.12 |
| ZJ-FY    | Fuyang, Zhejiang            | cultivated | Shiwu Village, Fuyang District, Hangzhou, Zhejiang Province        | 2021.12 |
| ZJ-WL    | Wenling, Zhejiang           | cultivated | Wenling County, Taizhou City, Zhejiang Province                    | 2021.12 |
| ZJ-WY    | Wuyi, Zhejiang              | cultivated | Wuyi County, Jinhua City, Zhejiang Province                        | 2021.12 |
| ZJ-QDH   | Qiandaohu, Zhejiang         | cultivated | Qiandao Lake, Hangzhou, Zhejiang Province                          | 2021.12 |
| ZJ-LX    | Lanxi, Zhejiang             | cultivated | Chisong Village, Lanxi City, Jinhua City, Zhejiang Province        | 2021.12 |
| ZJ-HZ    | Hangzhou, Zhejiang          | cultivated | Zhejaing herbal market                                             | 2021.12 |
| ZJ-JS    | Jingshan, Zhejiang          | cultivated | Zhejaing herbal market                                             | 2021.12 |
| ZJ-SX-SC | Shaoxing market circulation | cultivated | Zhejaing herbal market                                             | 2021.12 |
| ZJ-WZ    | Wenzhou, Zhejiang           | cultivated | Zhejaing herbal market                                             | 2021.12 |
| ZJ-NB    | Ningbo, Zhejiang            | cultivated | Huanhu East Road, Yinzhou District, Ningbo City, Zhejiang Province | 2021.12 |

---
